# Supplementary material for: Theoretical Derivation of Aerosol Lidar Ratio using Mie Theory for CALIOP-CALIPSO and OPAC Aerosol Models
Source: Copernicus journal article supplement (doi:10.5194/amt-2023-104), 2023-08-21
Supplement: Supplementary file [file amt-2023-104-RC1-supplement.pdf]

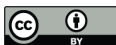

# 1 **Theoretical Derivation of Aerosol Lidar Ratio using Mie** 2 **Theory for CALIOP-CALIPSO and OPAC Aerosol Models**

3 Radhika A. Chipade<sup>1</sup> and Mehul R. Pandya<sup>1</sup>

4 <sup>1</sup>Space Applications Centre (ISRO), Ahmedabad, Gujarat, India – 380015.

5 *Correspondence to:* Radhika A. Chipade (radhikachipade@gmail.com)

6 **Abstract.** The extinction-to-backscattering ratio, popularly known as lidar (light detection and ranging) ratio of  
7 atmospheric aerosols is an important optical property, which is essential to retrieve the extinction profiles of  
8 atmospheric aerosols. Lidar satellite observations can provide the global coverage of atmospheric aerosols along  
9 with their vertical extent. NASA's Cloud-Aerosol Lidar with Orthogonal Polarisation (CALIOP) on-board Cloud-  
10 Aerosol Lidar and Infrared Pathfinder Satellite Observations (CALIPSO) is the only space-based platform  
11 available so far, that provides the vertical profiles of extinction due to atmospheric aerosols. A physics-based  
12 theoretical approach is presented in the present paper that estimates lidar ratio values for CALIPSO aerosol  
13 models, which can be used as inputs to determine the extinction profiles of aerosols using CALIPSO data. The  
14 developed methodology was also qualified by comparing it with the lidar ratio values derived using AERONET  
15 datasets. Lidar ratio for CALIPSO aerosols models were estimated in the range of 38.72 sr to 85.98 sr at 532 nm  
16 whereas, at 1064 nm lidar ratio varied between 20.11 sr to 71.11 sr depending upon the aerosol type and their size  
17 distributions.

18 Aerosols are compositions of various particles and thus the presence of water vapour in the atmosphere can affect  
19 the optical properties of the aerosols. Thus, the effect of relative humidity on lidar ratio was studied using Optical  
20 Properties of Cloud and Aerosols software tool (OPAC) aerosol models, which are the standard aerosol models  
21 against the cluster classified AERONET and CALIPSO aerosol models. Water soluble particles contribute  
22 substantially in clean continental, clean marine, tropical marine and desert aerosol models and are hygroscopic in  
23 nature. Hygroscopic sulfate particles dominate the Antarctic aerosols during summertime. In presence of relative  
24 humidity between 0 – 80%, the lidar ratio values were observed to decrease from 53.59 sr to 47.13 sr, 53.66 sr to  
25 47.15 sr, 53.70 sr to 47.16 sr and 55.32 sr to 48.78 sr at 532 nm for clean continental, clean marine, tropical marine  
26 and desert aerosols respectively, whereas lidar ratio gradually increased from 47.13 sr to 51 sr, 47.15 sr to 51 sr,  
27 47.16 sr to 51 sr and 48.78 sr to 51.68 sr respectively for these aerosol models when relative humidity was between  
28 80 – 99%; due to constituent hygroscopic particles. In case of Antarctic aerosols, the lidar ratio was observed to  
29 increase from 57.73 sr to 97.64 sr due to hygroscopic sulfate particles that backscattered heavily in presence of  
30 water vapour at 532 nm. The soot particles dominate the polluted continental and polluted marine particles causing  
31 an increase in lidar ratio over corresponding clean counterpart. Similar results were observed at 1064 nm for  
32 OPAC aerosol models.

## 33 **1 Introduction:**

34 The light detection and ranging (lidar) measurements are considered appropriate to retrieve the range-resolved  
35 values of vertical backscatter and extinction profiles of tropospheric aerosols. The single scattering lidar equation  
36 is solved in order to determine extinction and backscatter profiles of aerosols, which depends on the ratio of

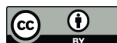

37 extinction-to-backscatter coefficient, known as lidar ratio. Thus, estimation of lidar ratio is essential to solve the  
38 lidar equation and important in the study of climatic impact of aerosols.

39 Many researchers have reported the lidar ratio estimation as a part of retrieval of extinction and backscatter profiles  
40 of tropospheric aerosols using ground as well as satellite data. Takamura et al. (1994) derived lidar ratio combining  
41 the measurements from lidar, sunphotometer and optical particle counter. Lidar ratio can be directly estimated  
42 using the Raman lidar. Ansmann et al. (2002) demonstrated that the lidar ratio retrieved using Raman lidar can be  
43 used to retrieve extinction profiles of the aerosols using elastic backscatter lidar. The National Aeronautics **And**  
44 Space Administration's (NASA's) Cloud-Aerosol Lidar with Orthogonal Polarisation (CALIOP) on-board Cloud-  
45 Aerosol Lidar and Infrared Pathfinder Satellite Observations (CALIPSO) launched in 2006 is the only available  
46 source of satellite data to retrieve vertical profiles of tropospheric aerosols. CALIOP is an elastic backscatter lidar  
47 (Hunt et al. 2009) that records the backscatter photon counts due to tropospheric aerosols and the vertical  
48 extinction and backscatter profiles of aerosols are retrieved solving the single scattering lidar equation (Young  
49 and Vaughan 2009). This retrieval process uses a look-up table approach for lidar ratio in order to solve the lidar  
50 equation. The lidar ratio selection scheme used for CALIOP-CALIPSO products is based on cluster analysis of  
51 aerosol measurements using data recorded at several AERONET network stations spread across the globe (Omar  
52 et al. 2009, Young and Vaughan 2009). Thus, a novel theoretical approach is **presented in the present paper** to  
53 retrieve the lidar ratio for CALIOP-CALIPSO aerosol models.

54 The lidar ratio depends on two optical properties viz. extinction coefficient and backscattering coefficient and  
55 thus, it depends on the incident wavelength, refractive index and the size distribution of the aerosols. In real  
56 atmospheric conditions, aerosols exhibit different shapes and sizes and are composed of various kinds of  
57 compounds. In addition to this, various aerosol components are affected due to variations in relative humidity.  
58 Thus, it is essential to study the variations in lidar ratio due to different atmospheric conditions for various  
59 compositions of aerosols. Salemink et al. (1984) reported a linear increase in the lidar ratio when relative humidity  
60 was increased from 40% to 80% during a field experiment details of which are not mentioned in the paper.  
61 Ackermann (1998) has reported a numerical study of lidar ratio with respect to variations in relative humidity for  
62 Nd:YAG wavelengths for continental, maritime and desert aerosol models where author has considered some  
63 hypothetical cases for number mixing ratios of the aerosol components. He has established a non-linear  
64 relationship between relative humidity and lidar ratio. Zhao et al. (2017) used Mie theory and k-Kohler theory  
65 to study the influences of aerosol hygroscopic growth on lidar ratio and used *in-situ* data collected during a field  
66 campaign to establish a relationship between lidar ratio and relative humidity. Dusing et al. (2021) has also  
67 established a non-linear relationship between lidar ratio and relative humidity for Central European aerosols using  
68 *in-situ* data. Optical properties of aerosols are important to study the radiation balance of the Earth and climate  
69 change. Optical Properties of Cloud and Aerosols (OPAC) software tool facilitates with the dataset of optical  
70 properties of the aerosols and clouds and a program to extract these datasets. The standard global aerosol models  
71 are considered in OPAC as given in d'Almeida et al. (1991) and Hess et al. (1998). Component mixing in aerosols  
72 is based on particle number densities, which are independent of relative humidities in OPAC. However, this will  
73 affect the aerosol lidar ratio.

74 Several authors have reported different lidar ratio values for different aerosol models using a variety of  
75 methodologies. d'Almeida et al. (1991) have reported values of 16-22 sr for clean marine and desert models at  
76 ruby wavelength when lidar ratio was estimated as ratio of extinction coefficient to phase function at 180°. They

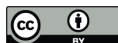

77 have reported a value up to 80 sr for Antarctic aerosols at ruby wavelength. Anderson et al. (2000) have showed  
78 a variation of 8 to 95 sr in lidar ratio values for polluted continental model at 532 nm using nephelometer data.  
79 Omar et al. (2009) have reported lidar ratio values for desert, smoke, clean continental, polluted continental, clean  
80 marine and polluted dust aerosols at 532 nm and 1064 nm varying between 20-70 sr using AERONET data. These  
81 values are reported with 30% uncertainty and are selected as lidar ratio in CALIPSO-V1 operational algorithms.  
82 The lidar ratios for polluted dust aerosols are updated to 55 sr and 48 sr at 532 nm and 1064 nm respectively, in  
83 CALIPSO-V3 operational algorithm whereas lidar ratio for clean continental aerosols is updated to 53 sr at 532  
84 nm in CALIPSO-V4 operational algorithm (Kim et al. 2018). Lopes et al. (2013) have reported a regional study  
85 in Brazil about lidar ratio selection algorithm for CALIPSO data only at 532 nm using AERONET sun  
86 photometers. They have reported the similar values for all aerosol models as used in CALIPSO-V1 algorithm by  
87 Omar et al. (2009) except for polluted dust in which case the lidar ratio value is updated to 55 sr. Li et al. (2022)  
88 have assessed CALIPSO-V4 lidar ratio selection algorithm by retrieving lidar ratios as combination of CALIPSO  
89 columnar attenuated backscatter and Synergised Optical Depth of Aerosols (SODA) algorithms. This study has  
90 ignored clean continental aerosols and has proposed elevated smoke and dusty marine aerosol models with lidar  
91 ratios of 47 sr and 32 sr respectively; during night at 532 nm.

92 The present study reports a theoretical approach for estimation of lidar ratio from various sources, such as aerosol  
93 models reported by Hess et al. (1998) (OPAC aerosol models), Omar et al. (2005 and 2009) for wavelengths 532  
94 nm, 673 nm and 1064 nm (CALIPSO and AERONET aerosol models). The variation in lidar ratio with respect to  
95 relative humidity was also studied at Nd:YAG wavelengths using OPAC (Hess et al. 1998) aerosol models. Hess  
96 et al. (1998) have reported aerosol models as composition of various components contributing to different aerosol  
97 types whereas Omar et al. (2005 and 2009) have reported aerosol models in terms of contribution from fine and  
98 coarse particles i.e. in terms of aerosol sizes. As mentioned earlier, theoretical approach for lidar ratio estimation  
99 using Mie theory is still a gap area for CALIPSO and OPAC aerosol models and thus, this study, attempts to  
100 provide a physics based theoretical approach covering all types of aerosol models over the varying lidar ratio  
101 values based on in-situ measurements.

102 The paper is organised into five sections. The first section presents the introductory literature review and  
103 motivation behind this study. The second section outlines the data used in this study. The detailed methodology  
104 and Mie theory for lidar ratio estimation is presented in the third section of this paper. The results are discussed  
105 in the fourth section whereas the concluding remarks are listed in the fifth section of this paper.

## 106 2 Input Data:

107 The lidar ratio depends on aerosol size distribution, refractive index and incident wavelength. The inputs used in  
108 this study are the aerosol models provided in d'Almeida et al. (1991), Ackermann (1998), Hess et al. (1998), and  
109 Omar et al. (2005 and 2009).

110 Table 1 and 2 present the CALIOP-CALIPSO aerosol models and cluster classified AERONET aerosol models  
111 respectively; defined in Omar et al. (2009 and 2005) at 532 nm, 673 nm and 1064nm. These data include the  
112 refractive indices (in terms of real part ( $m_r$ ) and imaginary part ( $m_i$ )) for each of the component aerosols along  
113 with the size distribution of the aerosol in terms of median radius ( $r_m$ ) and standard deviation ( $\sigma$ ).



114 Omar et al. (2005) have reported aerosol refractive indices at 673 nm and have classified aerosols through cluster  
115 analysis in six different categories numbered 1-6 viz. desert dust, biomass burning, rural, industrial pollution,  
116 polluted marine and dirty pollution using AERONET data. The desert dust and polluted marine (i.e. category 1  
117 and category 5) aerosol models represent the categories of aerosols originated from the natural sources whereas  
118 the biomass burning, continental pollution and dirty pollution (i.e. category 2, 4, and 6) aerosol models represent  
119 the aerosols emanating from the anthropogenic sources. Rural background aerosol model (i.e. category 3)  
120 represent those aerosols which are observed in relatively clean atmosphere.

121 The category 1 aerosols have fine fraction by volume of 0.22 indicating that coarse particles dominate the volume  
122 of this category. The mean radius and geometric standard deviation for the fine mode is of 0.12  $\mu\text{m}$  and 1.48  $\mu\text{m}$   
123 respectively; for this category. The refractive index of this category of aerosols is considered to be  $1.45 - 0.0036i$   
124 as reported in table 2. The sites considered for these category of aerosols are either desert regions, close to desert  
125 regions or the sites where desert dust has been observed as a result of long-range transport. The category 2 aerosols  
126 have fine fraction by volume of 0.33 whereas mean and geometric standard deviation for the fine mode is 0.14  
127  $\mu\text{m}$  and 1.56  $\mu\text{m}$  respectively. Category 2 aerosols are dominated by coarse mode particles which have a mean  
128 radius and geometric standard deviation of 3.73  $\mu\text{m}$  and 2.14  $\mu\text{m}$  respectively. Category 1 and category 2 aerosols  
129 have single scattering albedo values of 0.94 and 0.82 respectively which are estimated using Mie theory presented  
130 in this paper. These single scattering albedo values are consistent with those reported by Omar et al. (2005).

131 Category 3 aerosols are characterised by low optical depth values as they are originated from clean atmosphere.  
132 These aerosols have fine fraction by volume of 0.38 indicating dominance of coarse particles. The mean radius  
133 and geometric standard deviation for the fine mode is of 0.13  $\mu\text{m}$  and 1.50  $\mu\text{m}$  respectively. The refractive index  
134 for this category of aerosols is considered to be  $1.45 - 0.0092i$ . The single scattering albedo value is observed to  
135 0.89 for category 3 aerosols. The category 4 aerosols are found in urban centres or near urban centres and are  
136 dominated by the natural pollutants such as sulfate particles (Omar et al. 2005). The refractive index for these  
137 category of aerosols is considered to be  $1.41 - 0.0063i$  which is representing the natural pollutants comprising  
138 category 4 aerosols. The size distribution of category 4 aerosols is described by a mean radius and geometric  
139 standard deviation for fine mode of 0.16  $\mu\text{m}$  and 1.53  $\mu\text{m}$  respectively. The mean radius and geometric standard  
140 deviation for coarse mode is of 3.55  $\mu\text{m}$  and 2.07  $\mu\text{m}$  respectively. The single scattering albedo for these category  
141 of aerosols is estimated to be 0.93.

142 The category 5 aerosols are observed at islands or at coastal regions. The fine fraction by volume is of 0.26 and  
143 size distribution is described by a mean radius and geometric standard deviation for fine mode of 0.17  $\mu\text{m}$  and  
144 1.61  $\mu\text{m}$  respectively. The refractive index for these category of aerosols is considered to be  $1.39 - 0.0044i$ . These  
145 optical properties are resulted in the single scattering albedo of 0.94 for polluted marine aerosols. The category 6  
146 aerosols are similar to category 4 aerosols with a high imaginary part of refractive index. The refractive index of  
147 category 6 aerosols is considered to be  $1.41 - 0.0337i$  which resulted in low single scattering albedo of 0.68. The  
148 low single scattering albedo indicates that these are the aerosols with mostly carbon element in it (Omar et al.  
149 2005). The size distribution of these category of aerosols is described by a mean radius and geometric standard  
150 deviation of 0.14  $\mu\text{m}$  and 1.54  $\mu\text{m}$  respectively. The more details about these six categories of aerosols can be  
151 found in Omar et al. (2005).



152 The theoretically derived lidar ratios were compared with lidar ratio derived using AERONET data for three  
 153 different stations classified for each of the above-mentioned six categories. The details are discussed in results  
 154 section of this paper.  
 155 Table 3, 4 and 5 collectively report the OPAC aerosol models. These aerosol models are defined in terms of their  
 156 size distribution with respect to relative humidity, refractive indices at 532 nm and 1064 nm and composition of  
 157 aerosol types in terms of number mixing ratio ( $\mu$ ). The lognormally distributed aerosol components were  
 158 considered in this study. The relative humidity was varied from 0% to 99% with intermediate steps at 50%, 70%,  
 159 80%, 90% and 98%. The details about OPAC aerosol models can be found in Hess et al. (1998).

### 160 3 Computation of Lidar Ratio using Mie Theory:

161 In this study, the aerosols were assumed as homogeneous isotropic spheres scattering the electromagnetic  
 162 radiation incident upon them. These scattering phenomena are modelled using Mie theory, which is discussed  
 163 in Bohren, and Huffman (1983) and Vermote et al. (2006) and many other authors. The lidar ratio, which is defined  
 164 as the ratio of extinction coefficient to backscatter coefficient, is derived in the present study using the Mie theory  
 165 equations. The computational equations are presented here briefly, for the ready reference.

166 The Mie parameter ( $x$ ) for an aerosol with refractive index,  $m = n_r - in_i$ ; is defined as

$$167 \quad x = \frac{2\pi r}{\lambda}, \quad (1)$$

168 where  $r$  is the aerosol particle radius in micron and  $\lambda$  is the wavelength in micron. Here  $m$  is the refractive index  
 169 with real part  $n_r$  and imaginary part  $n_i$ .

170 Two complex functions  $S_1(x, m, \theta)$  and  $S_2(x, m, \theta)$  related to amplitude of scattered radiation that are  
 171 perpendicular and parallel to the plane of scattering with scattering angle  $\theta$ , respectively, can be defined as  
 172 follows.

$$173 \quad S_1(x, m, \theta) = \sum_{n=1}^{\infty} \frac{(2n+1)}{n(n+1)} [a_n(x, m)\pi_n(\cos\theta) + b_n(x, m)\tau_n(\cos\theta)] \text{ and} \quad (2)$$

$$174 \quad S_2(x, m, \theta) = \sum_{n=1}^{\infty} \frac{(2n+1)}{n(n+1)} [a_n(x, m)\tau_n(\cos\theta) + b_n(x, m)\pi_n(\cos\theta)], \quad (3)$$

175 where, the complex functions  $a_n(x, m)$  and  $b_n(x, m)$  are given by

$$176 \quad a_n(x, m) = \frac{\Psi'_n(mx)\Psi_n(x) - m\Psi_n(mx)\Psi'_n(x)}{\Psi'_n(mx)\xi_n(x) - m\Psi_n(mx)\xi'_n(x)} \text{ and} \quad (4)$$

$$177 \quad b_n(x, m) = \frac{m\Psi'_n(mx)\Psi_n(x) - \Psi_n(mx)\Psi'_n(x)}{m\Psi'_n(mx)\xi_n(x) - \Psi_n(mx)\xi'_n(x)}, \quad (5)$$

178 which are defined in terms of Ricatti-Bessel functions  $\Psi_n(z = x \text{ or } mx)$  and  $\xi_n(z = x \text{ or } mx)$ . Ricatti-Bessel  
 179 functions are evaluated using their logarithmic derivatives details of which are provided in Vermote et al. (2006).

180 In order to compute the complex functions  $S_1(x, m, \theta)$  and  $S_2(x, m, \theta)$ , the functions  $\pi_n$  and  $\tau_n$  are computed  
 181 using associated Legendre polynomials. The functions  $\pi_n$  and  $\tau_n$  are the functions of scattering angle  $\theta$ . These  
 182 can be computed using the recurrence relations

$$183 \quad n\pi_{n+1}(\cos\theta) = (2n+1)\cos\theta\pi_n(\cos\theta) - (n+1)\pi_{n-1}(\cos\theta) \text{ and} \quad (6)$$

$$184 \quad \tau_{n+1}(\cos\theta) = (n+1)\cos\theta\pi_{n+1}(\cos\theta) - (n+2)\pi_n(\cos\theta). \quad (7)$$

185 which are initialised with  $\pi_0(\cos\theta) = 0$ ,  $\pi_1(\cos\theta) = 1$ , and  $\tau_0(\cos\theta) = \cos\theta$ .



186 Using these quantities, the extinction efficiency ( $Q_e(\lambda, r, m)$ ), dimensionless angular-scattering intensity  
 187 efficiency ( $M_{11}(\lambda, r, m, \theta)$ ), the scattering efficiency ( $Q_{sca}(\lambda, r, m)$ ), and backscattering efficiency  
 188 ( $Q_{back}(\lambda, r, m)$ ) can be computed as

$$189 \quad Q_e(\lambda, r, m) = \frac{\sigma_e(\lambda, r, m)}{\pi r^2} = \frac{2}{x^2} \sum_{n=1}^{\infty} (2n+1) \text{Re}[a_n(x, m) + b_n(x, m)], \quad (8)$$

$$190 \quad M_{11}(\lambda, r, m, \theta) = \frac{1}{2x^2} [S_1(x, m, \theta)S_1^*(x, m, \theta) + S_1(x, m, \theta)S_2^*(x, m, \theta)], \quad (9)$$

$$191 \quad Q_{sca}(\lambda, r, m) = \frac{\sigma_{sca}(\lambda, r, m)}{\pi r^2} = \frac{2}{x^2} \sum_{n=1}^{\infty} (2n+1) [a_n(x, m)a_n^*(x, m) + b_n(x, m)b_n^*(x, m)] \text{ and} \quad (10)$$

$$192 \quad Q_{back}(\lambda, r, m) = \frac{4}{x^2} |S_1(x, m, 180^\circ)|^2 = 4M_{11}(\lambda, r, m, 180^\circ), \quad (11)$$

193 where  $r$  is the particle radius,  $\sigma_e(\lambda, r, m)$  is the extinction cross section and  $\sigma_{sca}(\lambda, r, m)$  is the scattering cross  
 194 section.

195 Thus, the lidar ratio can be computed as

$$196 \quad LR = \frac{Nr}{Dr} = \frac{\sum_{i=1}^M \int_0^{\infty} Q_e(\lambda, r, m_i) \pi r^2 n(r) dr}{\sum_{i=1}^M \int_0^{\infty} Q_{back}(\lambda, r, m_i) \pi r^2 n(r) dr}. \quad (12)$$

197 The single scattering albedo can be computed as

$$198 \quad \omega_0 = \frac{\sum_{i=1}^M \int_0^{\infty} Q_{sca}(\lambda, r, m_i) \pi r^2 n(r) dr}{\sum_{i=1}^M \int_0^{\infty} Q_e(\lambda, r, m_i) \pi r^2 n(r) dr}. \quad (13)$$

199 In this study, an aerosol is considered as mixture of its constituent components. And each of the component is  
 200 lognormally distributed with median radius  $r_m$  and standard deviation  $\sigma$ . Thus,

$$201 \quad n(r) = \frac{\mu N_{tot}}{\sqrt{2\pi r \ln(\sigma)}} \exp\left[-\frac{\ln^2(r/r_m)}{2 \ln^2 \sigma}\right], \quad (14)$$

202 where  $\mu$  is the number mixing ratio (i.e. normalised number particle concentration) and  $N_{tot}$  is the total number  
 203 density of the aerosol component.

204 The relative humidity influences the refractive index of the hygroscopic aerosol components and the effective  
 205 refractive index is

$$206 \quad m_i = m_w + (m_{0,i} - m_w) \left(\frac{r_{0,i}}{r_{m,i}}\right)^3, \quad (15)$$

207 where  $m_w$  is the refractive index of the water,  $m_{0,i}$  is the refractive index of the dry particle of component  $i$  and  
 208  $r_{0,i}$  is the median radius of the dry particle of component  $i$ .

209 The theory presented above is with the assumption of homogenous spherical isotropic aerosol particles, which  
 210 simplifies the computation of lidar ratio. However, if the particles are not homogenous and anisotropic then the  
 211 above theory may cause errors as the scattering phase function will differ to address the anisotropy. Moreover, if  
 212 the particles are nonhygroscopic especially when the particles are large as compared to the incident wavelength  
 213 then the above theory fails (Ackermann 1998).

## 214 4 Results and Discussion:

### 215 4.1 Lidar Ratio for AERONET and CALIPSO Aerosol Models defined in terms of particle sizes:

216 The aerosol models defined in terms of particle size by Omar et al. (2005 and 2009) were used to estimate the  
 217 lidar ratio for aerosol models used in operational algorithms of CALIOP-CALIPSO. Omar et al. (2005) used  
 218 cluster analysis for AERONET data to define the aerosol models at 673 nm. Table 6 shows the lidar ratio estimated  
 219 using the Mie theory for each of the six clusters defined by Omar et al. (2005). The maximum lidar ratio of 48.87



220 sr was observed for dirty pollution type of aerosols whereas the minimum of 28.76 sr was observed for desert dust  
221 kind of aerosols. The lidar ratios at 532 nm are mostly discussed in literature (Ackermann 1998, Anderson et al.  
222 2000, Omar et al. 2009, Lopes et al. 2013 and Kim et al. 2018 and 2022) and scanty literature is available for lidar  
223 ratios at 673 nm. Moreover, these aerosol models are derived using AERONET data. Thus, the estimated lidar  
224 ratios at 673 nm were compared with those of the AERONET data.

225 The data for three different stations for each of the category was selected and aerosol lidar ratio was computed  
226 using equation (12) as a multiplier of  $4\pi$ . Tables 7-12 show the statistics of the lidar ratio for different AERONET  
227 stations belonging to different categories. The daily averages of the lidar ratios were obtained using the  
228 AERONET single scattering albedo and phase function values and were compared with the Mie theory estimated  
229 values. The Mie theory estimated values were observed to comply with the observed values of lidar ratios using  
230 AERONET data as the theoretically estimated values were lying in between the minimum and maximum of the  
231 daily lidar ratio values. The differences in the theoretical values estimated using Mie theory and those observed  
232 using AERONET data were primarily due to the refractive indices of the different aerosol types present at the  
233 different AERONET stations. Omar et al. (2005) had classified the different aerosol types mentioned in section 2  
234 using cluster analysis and the geographical location of these AERONET stations was also considered to be an  
235 important factor while classification. Thus the composition of the aerosols observed over a period of time varied  
236 resulting in the variation of the refractive indices. The theoretically computed lidar ratios were based on the  
237 refractive index of the centre of the cluster analysed using AERONET data before 2002 (Omar et al. 2005) whereas  
238 the AERONET stations data used in this study spanned over 1998 to 2021 leading to the differences in the  
239 refractive indices of the aerosol types. The shape of the aerosol particles, their size distribution and their particle  
240 density present in the atmosphere may be the secondary reasons for the differences between the theoretically  
241 estimated values of lidar ratio using Mie theory and the lidar ratio computed using AERONET stations data which  
242 needs further investigation.

243 The aerosol models derived using the cluster analysis by Omar et al. (2005) and their respective lidar ratios were  
244 used in lidar ratio selection and feature detection algorithm of CALIOP-CALIPSO (Young and Vaughan 2009).  
245 These aerosol models and their respective lidar ratios used in operational algorithms of CALIOP-CALIPSO are  
246 specified in Young and Vaughan (2009). These lidar ratios were subsequently updated in the V3 and V4 CALIOP-  
247 CALIPSO operational algorithms (Kim et al. 2018). The basis for lidar ratio selection algorithm for CALIOP-  
248 CALIPSO operational products has been the cluster analysis using the AERONET data and thus, the lidar ratios  
249 were estimated using Mie theory, which gives the physical basis for the lidar ratio selection algorithm.

250 Figure 1 and 2 show the distribution of extinction and backscatter coefficients for CALIPSO aerosol models at  
251 532 nm and 1064 nm; respectively. The particle sizes were varied from 0.01  $\mu\text{m}$  to 5  $\mu\text{m}$  and the cut-off radius  
252 for fine particles was taken to be 1  $\mu\text{m}$  for all CALIPSO aerosol models except clean marine aerosols in which  
253 case the fine particle radius cut-off was 0.6  $\mu\text{m}$ . The maxima of extinction and backscatter coefficients at 532 nm  
254 and 1064 nm, for all aerosol models except clean marine aerosols was observed between 0.07  $\mu\text{m}$  to 0.4  $\mu\text{m}$ . In  
255 case of all aerosol models, it was observed that the contribution from fine particles was more in magnitude  
256 compared to that from coarser particles at 532 nm and 1064 nm except the clean marine model. In case of clean  
257 marine aerosols at 1064 nm, the coarser particles were observed to contribute significantly in magnitude to the  
258 extinction coefficient as compared to fine particles producing lidar ratio value of 71 sr.



259 Table 13 shows the lidar ratio values estimated for the CALIPSO aerosol models specified in Omar et al. (2009)  
260 and its comparison with the lidar ratio values selected in various versions of CALIOP-CALIPSO operational  
261 algorithms. It was observed that the lidar ratio values estimated using Mie theory in present study comply with  
262 the lidar ratio values reported in literature for CALIPSO operational algorithms. The lidar ratio proposed for clean  
263 continental model at 532 nm in CALIPSO V4 operational algorithm was  $53 \pm 24$  sr, allowing the variation up to  
264 77 sr. The Mie theory estimate for clean continental model at 532 nm was centred on 85 sr considering the  
265 refractive index of the centre cluster as provided in Omar et al. (2009). The variation in refractive index will affect  
266 the lidar ratio value, which was evident when compared to OPAC aerosol models where the lidar ratio of clean  
267 continental aerosols was centred on 53 sr. Similar results were observed in case of clean marine aerosols at 532  
268 nm and desert dust particles at 1064 nm. In case of desert dust particles at 1064 nm the variation up to 31 sr was  
269 allowed in CALISPO V4 operational algorithm whereas the present study proposed lidar ratio value of 20 sr for  
270 desert dust aerosols at 1064 nm. The desert dust lidar ratio at 1064 nm proposed for CALIPSO aerosol model was  
271 observed to be consistent with OPAC desert aerosol model in which case lidar ratio was observed to be centred  
272 on 23 sr. These results for desert aerosols at 1064 nm comply with those reported by Ackermann (1998) where  
273 dry desert aerosol lidar ratio was lying just under 20 sr. The results for OPAC aerosol models are discussed in  
274 detail in the subsequent section. CALISPO operational V3 algorithm allowed variation up to 68 sr in lidar ratio  
275 of clean marine aerosols at 1064 nm whereas the present study estimated the value of 71 sr for clean marine  
276 aerosols at 1064 nm. The theoretically estimated lidar ratio for clean marine aerosols at 532 nm was observed to  
277 be consistent with that reported in the literature. The theoretically proposed value in the present study for clean  
278 marine aerosols at 532 nm was 57.31 sr whereas Li et al. (2022) reported the median value of lidar ratio for clean  
279 marine aerosols of 60 sr. Thus, the Mie theory estimated lidar ratio values can provide the physical basis for the  
280 CALIPSO operational algorithms and can be used as look-up table to derive the vertical extinction and backscatter  
281 particulate profiles using satellite data.

282 The theoretical approach proposed in this study to estimate lidar ratio for CALIPSO aerosol models was further  
283 validated through estimation of single scattering albedo at 673 nm for the aerosol models classified using  
284 AERONET data as described in table 2. The single scattering albedo values for AERONET aerosol models viz.  
285 Category 1 to Category 6 were estimated using the above presented Mie theory as 0.94, 0.82, 0.89, 0.93, 0.94 and  
286 0.68 respectively. The single scattering values at 673 nm for these AERONET aerosol models viz. Category 1 to  
287 Category 6 were reported by Omar et al. (2005) as 0.93, 0.80, 0.88, 0.92, 0.93 and 0.72. The comparison between  
288 the theoretically estimated and literature reported single scattering albedo values showed the percent absolute  
289 difference between 1.06% to 5.56%, which validates the proposed Mie theory for estimation of lidar ratio.

#### 290 **4.2 Lidar Ratio for OPAC Aerosol Models Defined in terms of Constituent Components:**

291 The lidar ratios were also estimated when aerosol models were specified in terms of different constituent  
292 compositions as used in OPAC. The aerosol models viz. clean continental, average continental, polluted  
293 continental, urban, clean maritime, maritime tropical, polluted maritime, desert, arctic and antarctic were used in  
294 the present study to estimate the lidar ratio using Mie theory. The number mixing ratios as specified in OPAC  
295 software by Hess et al. (1998) were used in the present study to define the size distribution of aerosols. The relative  
296 humidity causes an increase in size of a hygroscopic particle such as water soluble, sea salt and sulfate particles.  
297 Thus, the backscattering and extinction profiles of these particles are significantly affected.





298 Figure 3 shows the variation in backscatter coefficient of the continental and maritime aerosols at 532 nm and  
299 1064 nm. The backscattering coefficient of continental and maritime aerosols were observed to increase when  
300 relative humidity was increased from 0% to 99%. **The increase in backscattering with relative humidity was**  
301 **considerably higher in polluted continental, urban and polluted maritime aerosols as compared to clean continental**  
302 **and clean maritime aerosols at 532 nm and 1064 nm.** Clean maritime and tropical maritime aerosols were observed  
303 to have equivalent backscattering coefficients due to their equivalent composition of water soluble and sea salt  
304 particles.

305 Figure 4 shows the variation in backscattering coefficients of the desert, arctic and antarctic aerosol models at 532  
306 nm and 1064 nm. The Antarctic aerosols showed a sharp and significant increase in their backscattering  
307 coefficients at 532 nm and 1064 nm. The increase in backscattering coefficients was observed to be more at 1064  
308 nm compared to 532 nm. **This causes the decrease in lidar ratio at 1064 nm as compared to that at 532 nm as can**  
309 **be observed from figure 6.** Increase in backscattering coefficient with relative humidity at 532 nm and 1064 nm  
310 will cause increase or decrease in lidar ratio with respect to relative humidity depending upon the rate at which  
311 the extinction and backscattering coefficients are increasing or decreasing.

312 The variation in lidar ratios of continental and maritime aerosol models with reference to relative humidity at 532  
313 nm and 1064 nm is as shown in figure 5. The lidar ratio showed an increase in values for polluted continental and  
314 polluted maritime aerosols over the clean continental and clean maritime aerosols. This increase was mainly  
315 observed due to greater contribution of soot particles in the polluted aerosols. An increase in lidar ratio values was  
316 observed at 532 nm and 1064 nm when relative humidity was increased from 80% to 99% in all types of  
317 continental and maritime aerosols. The decrease in lidar ratio when relative humidity was increased from 0% to  
318 80% was observed due to decrease in lidar ratio of the water soluble particles which are hygroscopic in nature.  
319 This decrease was primarily due to significant decrease in the imaginary part of the refractive index of water  
320 soluble component due to relative humidity. Continental and Maritime aerosols are dominated by water soluble  
321 particles as defined in OPAC and thus an initial decrease and a gradual increase in lidar ratio values was observed  
322 at 532 nm and 1064 nm when relative humidity was increased from 0% to 99%.

323 The lidar ratio values of the clean continental model and clean maritime aerosol models at 532 nm and 1064 nm  
324 where observed to be centred around 53 sr to 51 sr with varying relative humidity. This is mainly because of the  
325 composition of aerosol models as defined in OPAC. In both, clean continental and clean maritime models, water  
326 soluble particles were dominant which are smaller in size as compared to the sea salt particles. However, in OPAC  
327 the number mixing ratio of sea salt particles which are coarser particles, is very low as compared to finer water  
328 soluble particles; which is not the case in CALIPSO clean marine aerosol model. In CALIPSO clean marine  
329 model, though coarser particles are more in proportion their contribution to the backscattering and extinction  
330 coefficient was observed to be less in magnitude as compared to the fine particles at 532 nm. Thus, the resulting  
331 lidar ratio values for CALIPSO aerosol model were centred on 57 sr at 532 nm, which was consistent with the  
332 results for OPAC clean maritime aerosol model.

333 The urban aerosols showed a significant increase in the lidar ratio values at 532 nm and 1064 nm compared to  
334 other continental aerosols. The dry urban aerosols showed a lidar ratio of 74.88 sr and 61.73 sr at 532 nm and  
335 1064 nm respectively; whereas dry clean continental aerosols exhibited the lidar ratio of 53.59 sr and 23.9 sr at  
336 532 nm and 1064 nm respectively. This significant increase in lidar ratio values of urban aerosols is primarily due  
337 to scattering soot particles. Insoluble particles hardly have any impact on lidar ratio values of urban and continental



338 aerosols due to their very small composition. Similar results were observed when polluted maritime particles were  
339 compared to the clean maritime particles.

340 The variation in lidar ratios of desert, arctic and antarctic aerosols with respect to relative humidity is as shown in  
341 figure 6. The lidar ratio values at 532 nm were observed to be greater than those at 1064 nm values for desert and  
342 antarctic aerosols. The dry desert dust lidar ratio at 532 nm was observed to be 55.32 sr. This result comply with  
343 the values for desert dust lidar ratio at 532 nm reported in literature by Muller et al. (2007), Omar et al. (2009),  
344 Kim et al. (2018) and Li et al. (2022). The lidar ratio values showed a decrease with relative humidity except the  
345 lidar ratio values of antarctic aerosols at 532 nm and 1064 nm. The model of arctic aerosols that is used in the  
346 present study is for spring season when the arctic aerosols are mainly the soot particles. Thus, a decrease in lidar  
347 ratio values with relative humidity was observed in arctic aerosols as it was in polluted continental and urban  
348 aerosols at 1064 nm.

349 The lidar ratio of dry Antarctic aerosols was observed to be 57.73 sr at 532 nm and 20.90 sr at 1064 nm. The  
350 summertime model of Antarctic aerosols as defined in OPAC was used in the present study where the Antarctic  
351 aerosols are dominated by the sulfate particles. Sulfate particles are hygroscopic in nature with significant large  
352 sizes as compared to water soluble particles. The imaginary part of refractive index of sulfate particles in  
353 considerably small as compared to water soluble particles at 532 nm and 1064 nm. Thus, a sharp increase in lidar  
354 ratio of sulfate particles was observed when relative humidity was increased from 0% to 99% as opposed to  
355 continental, maritime and desert aerosol models.

## 356 5 Conclusions:

357 This paper presented a complex theoretical approach for estimating lidar ratio through Mie theory using CALIPSO  
358 and OPAC aerosol models. The lidar ratios were estimated at three wavelengths viz. 532 nm, 673 nm and 1064  
359 nm. Mie theory estimated lidar ratios at 673 nm were compared with AERONET data-derived lidar ratios at 675  
360 nm and Mie theory estimated lidar ratios at 673 nm were observed to lie between the minima and maxima of the  
361 AERONET data-derived lidar ratios at 675 nm. Mie theory estimated lidar ratio values for CALIPSO aerosol  
362 models were in good agreement with those reported in literature for CALIPSO operational algorithm. Thus,  
363 theoretically estimated lidar ratios for CALIPSO aerosol models may be used in future for CALIPSO operational  
364 algorithms. CALIPSO aerosol models were specified in terms of number mixing ratio of the fine and coarse  
365 particles instead of component particle type and fine particles were observed to have more significant contribution  
366 towards extinction and backscattering coefficient despite their low mixing ratio as compared to coarse particles.  
367 Thus, Mie theory derived lidar ratio values provide the physical basis for the lidar ratio selection algorithm for  
368 derivation of vertical extinction and backscatter particulate profiles using CALIPSO data.

369 The dependence of lidar ratio with relative humidity was analysed using OPAC aerosol models including Arctic  
370 and Antarctic aerosols where each aerosol type was identified with the corresponding number mixing ratio of the  
371 component particles. The lidar ratio was observed to decrease when relative humidity was increased from 0% to  
372 80% and a gradual increase in lidar ratio was observed when relative humidity was increased further to 99%. This  
373 phenomenon is the result of dominance of hygroscopic water-soluble particles constituting clean continental, clean  
374 marine, tropical continental and desert aerosols. The increase in number mixing ratio of soot particles showed an  
375 overall increase in the lidar ratio values of polluted continental, urban and polluted marine aerosols over clean



376 continental and clean marine particles. The soot particles dominate the urban aerosols and arctic aerosols, which  
377 are non-hygroscopic fine particles. Thus, a decrease in lidar ratio of urban and arctic aerosols was observed with  
378 respect to relative humidity and an increase in the backscattering coefficient of urban and arctic aerosols was  
379 observed with relative humidity due to contribution from the hygroscopic water-soluble particles that grows in  
380 size in presence of water vapour in the atmosphere. In case of Antarctic aerosols, the lidar ratio was observed to  
381 increase with respect to relative humidity due to hygroscopic sulfate particles that backscattered heavily in  
382 presence of water vapour.

383 The method presented in this study to estimate the lidar ratio using Mie theory is valid only for spherical, isotropic,  
384 non-hygroscopic particles and thus there can be possible errors occurring in the lidar ratio values especially when  
385 the aerosols are anisotropic and hygroscopic in nature. Thus, there is future scope for the present study to extend  
386 it to theoretical estimation of lidar ratio in case of hygroscopic and anisotropic non-homogeneous particles.

#### 387 **6 Acknowledgement:**

388 The authors are thankful to Shri. N. M. Desai, Director-SAC (ISRO), Dr. Rashmi Sharma, DD-EPSA/SAC and  
389 Dr. B. K. Bhattacharya, GD-AESG/EPSA/SAC for their support and encouragement to carry out this work. The  
390 authors are thankful to all those who directly and indirectly supported in realisation of this activity. This research  
391 is carried out under SAC, ISRO's TDP/R&D program.

#### 392 **7 Competing Interests:**

393 This is being declared that none of the authors have any competing interests.

#### 394 **8 References:**

- 395 Ackermann, J.: The Extinction-to-Backscatter Ratio of Tropospheric Aerosol: A Numerical Study, *J. Atm. Ocea.*  
396 *Tech.*, 15, 1043-1050, 1998.
- 397 Anderson, T. L., Masonis, S. J., Covert, D. S., Charlson, R. J., and Rood, M. J.: In situ measurement of the Aerosol  
398 Extinction-to-Backscatter Ratio at a Polluted Continental Site, *JGR*, 105, 26907-26915, 2000.
- 399 Ansmann, A., Wagner, F., Müller, D., Althausen, D., Herber, A., von Hoyningen-Huene, W., and Wandinger, U.:  
400 European Pollution Outbreaks during ACE 2: Optical Particle Properties Inferred from Multiwavelength Lidar  
401 and Star-Sun Photometry, *J. Geophys. Res.-Atmos.*, 107, 8–14, 2002.
- 402 Bohren, C. F., and Huffman, D. R.: *Absorption and Scattering of Light by Small Particles*, Wiley and Sons, 530  
403 pp., 1983.
- 404 d'Almeida, G., Koepke, P., and Shettle, E. P.: *Atmospheric Aerosols: Global Climatology and Radiative*  
405 *Characteristics*, A. Deepak, 561 pp., 1991
- 406 Dusing, S., Ansmann A., Baars, H., Corbin, J. C., Denjean, C., Gysel-Beer, M., Muller, T., Poulain, L., Siebert,  
407 H., Spindler, G., Tuch, T., Wehner, B., and Wiedensohler, B.: Measurement Report: Comparison of Airborne, in-  
408 situ Measured, Lidar-based and Modeled Aerosol Optical Properties in the Central European Background –  
409 Identifying Sources of Deviations, *Atmos. Chem. Phys.*, 21, 16745-16773, 2021.



- 410 Hess, M., Koepke, P., and Schult, I.: Optical Properties of Aerosols and Clouds: The Software Package OPAC,  
411 Bull. Amer. Meteor. Soc., 79, 831-844, 1998.
- 412 Kim, M. H., Omar, A. H., Tackett, J. L., Vaughan, M. A., Winker, D. M., Trepte, C. R., Hu, Y., Liu, Z., Poole, L.  
413 R., Pitts, M. C., Ka, J., Magill, E.: The CALIPSO version 4 Automated Aerosol Classification and Lidar Ratio  
414 Selection Algorithm, *Atm. Meas. Tech.*, 11, 6107-6135, 2018.
- 415 Li, Z., Painemal, D., Schuster, G., Clayton, M., Ferrare, R. A., Vaughan, M. A., Josset, D., Kar, J., Trepte, C. R.:  
416 Assessment of Tropospheric CALIPSO Version 4.2 Aerosol Types over the Ocean using Independent CALIPSO-  
417 SODA Lidar Ratios, *Atm. Meas. Tech.*, 15, 2745-2766, 2022.
- 418 Lopes, F. J. S., Landulfo, E., and Vaughan, M. A.: Evaluating CALIPSO's 532 nm lidar ratio selection algorithm  
419 using AERONET sun photometers in Brazil, *Atmos. Meas. Tech.*, 6, 3281-3299, 2013.
- 420 Muller, D., Ansmann, A., Mattis, I., Tesche, M., Wandinger, U., Althausen, D., and Pisani, G. : Aerosol-type-  
421 dependent Lidar Ratios Observed with Raman Lidar, *JGR*, 112, D16202, 2007.
- 422 Omar, A. H., Won, J. G., Winker, D. M., Yoon, S. C., Dubovik, O., and McCormick, M. P.: Development of  
423 Global Aerosol Models using Cluster Analysis of Aerosol Robotic Network (AERONET) Measurements, *JGR*,  
424 110, 1-14, 2005.
- 425 Omar, A. H., Winker, D. M., Kittaka, C., Vaughan, M. A., Liu, Z., Hu, Y., Trepte, C. R., Rogers, R. R., Ferrare,  
426 R. A., Lee, K. P., Kuehn, R. E., and Hostetler, C. A.: The CALIPSO Automated Aerosol Classification and Lidar  
427 Ratio Selection Algorithm, *J. Atm. Ocea. Tech.*, 26, 1994-2014, 2009.
- 428 Salemink, H., Schotanus, P., and Bergwerff, J. B.: Quantitative Lidar at 532 nm for Vertical Extinction Profiles  
429 in the Lidar Solution, *Appl. Phys.*, 34B, 187-189, 1984.
- 430 Takamura, T., Sasano Y., and Hayasaka T.: Tropospheric Aerosol Optical Properties Derived from Lidar, Sun  
431 Photometer, and Optical Particle Counter Measurements, *Appl. Opt.*, 33, 7132-7140, 1994.
- 432 Vermote, E. F., Tanre, D., Deuze, J. L., Herman, M., Morcrette, J. J., Kotchenova, S. Y.: Second Simulation of a  
433 Satellite Signal in the Solar Spectrum – Vector (6SV) User Guide Version 3 – Part II, available at  
434 (<http://6s.ltdri.org/>), 2006.
- 435 Young, S. A. and Vaughan, M. A.: The Retrieval of Profiles of Particulate Extinction from Cloud-Aerosol Lidar  
436 Infrared Pathfinder Satellite Observations (CALIPSO) data: Algorithm Description, *J. Atm. Ocea. Tech.*, 26,  
437 1105-1119, 2009.
- 438 Zhao, G., Zhao, C., Kuang, Y., Tao, J., Tan, W., Bian, W., Li, J. and Li, C.: Impact of Aerosol Hygroscopic  
439 Growth on Retrieving Aerosol Extinction Coefficient Profiles from Elastic-Backscatter Lidar Signals, *Atmos.*  
440 *Chem. Phys.*, 17, 12133-12143, 2017.
- 441
- 442

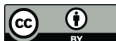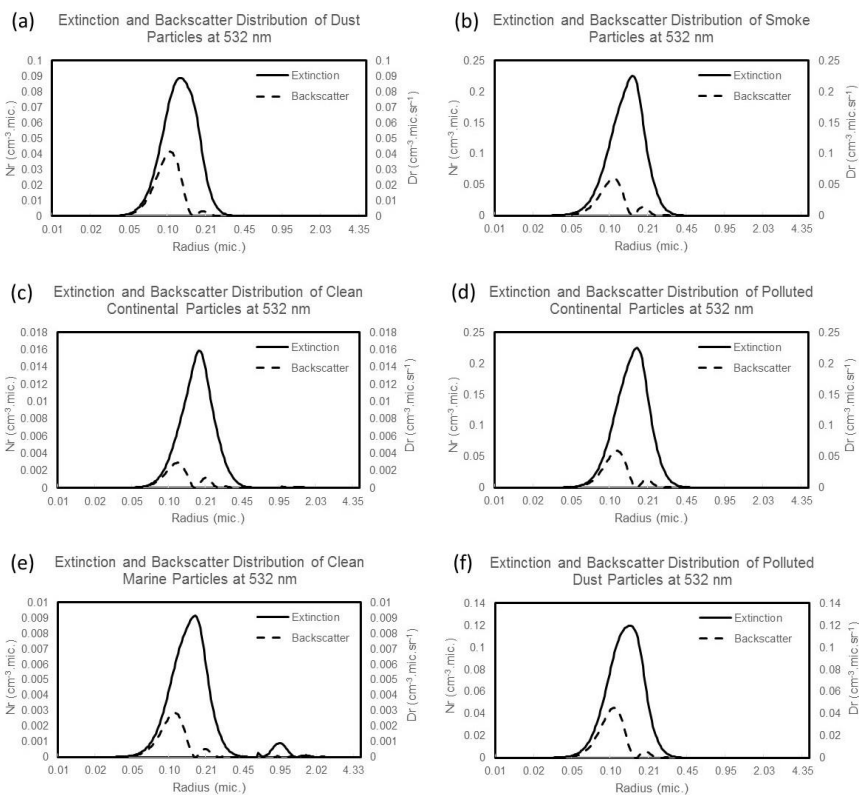

443

444

445

446

447

448

449

450

451

452

453

454

455

**Figure 1:** Extinction and Backscatter Distribution at 532 nm of CALIPSO Aerosol Models viz. (a) Dust (b) Smoke (c) Clean Continental (d) Polluted Continental (e) Clean Marine and (f) Polluted Dust



456

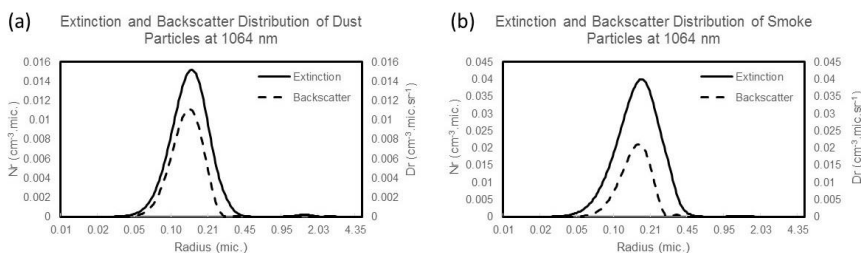

457

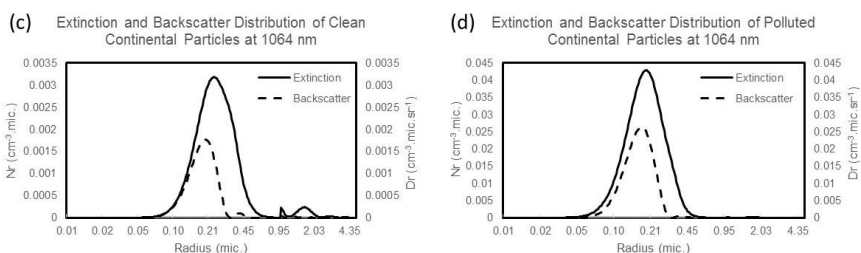

458

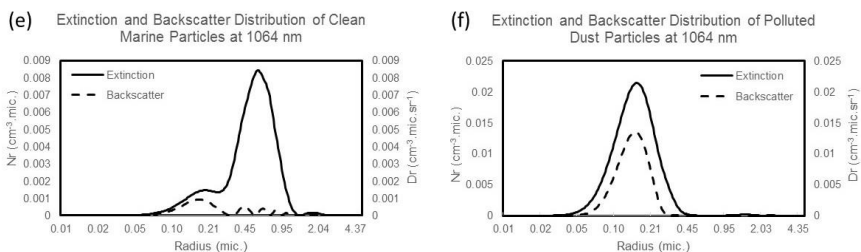

459

**Figure 2:** Extinction and Backscatter Distribution at 1064 nm of CALIPSO Aerosol Models viz. (a) Dust (b) Smoke (c) Clean Continental (d) Polluted Continental (e) Clean Marine and (f) Polluted Dust

460

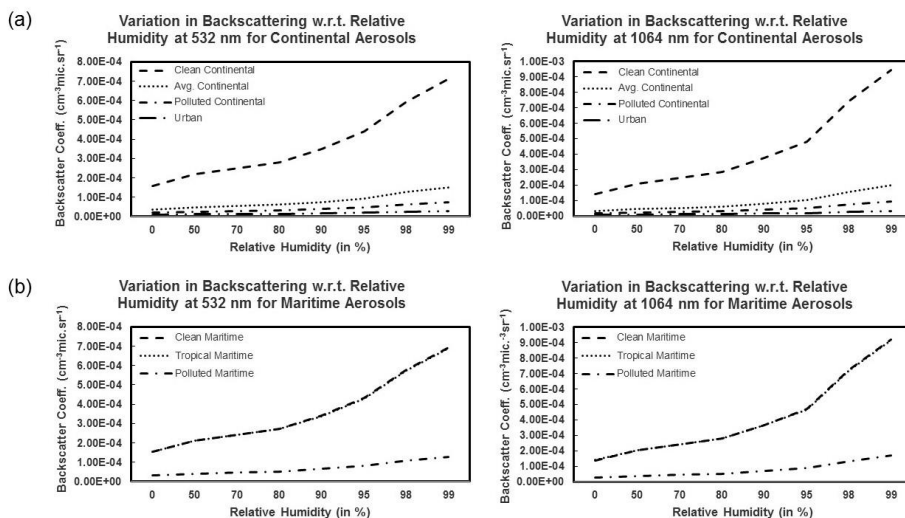

461

462

463

**Figure 3:** Variation in Backscattering Coefficient w.r.t. Relative Humidity for (a) Continental Aerosols and (b) Maritime Aerosols at 532 nm and 1064 nm.



464

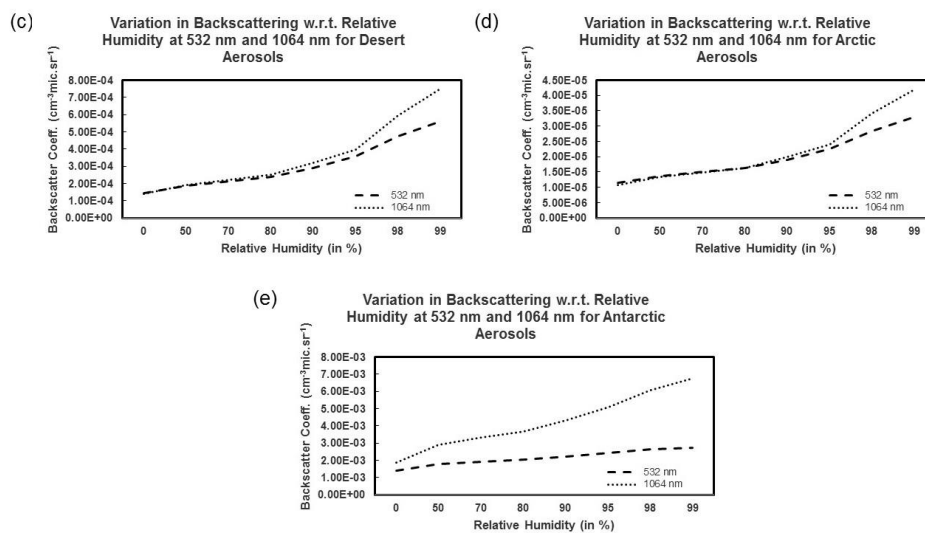

465

466 **Figure 4:** Variation in Backscattering Coefficient w.r.t. Relative Humidity for (c) Desert Aerosols and (d)  
 467 Arctic Aerosols and (e) Antarctic Aerosols at 532 nm and 1064 nm.

468

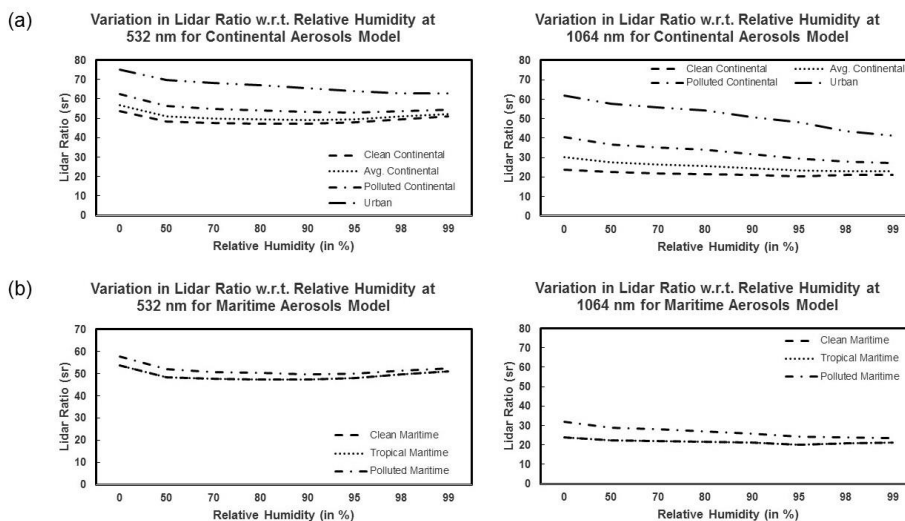

469

470 **Figure 5:** Variation in Lidar Ratio w.r.t. Relative Humidity for (a) Continental Aerosols and (b) Maritime  
 471 Aerosols at 532 nm and 1064 nm.

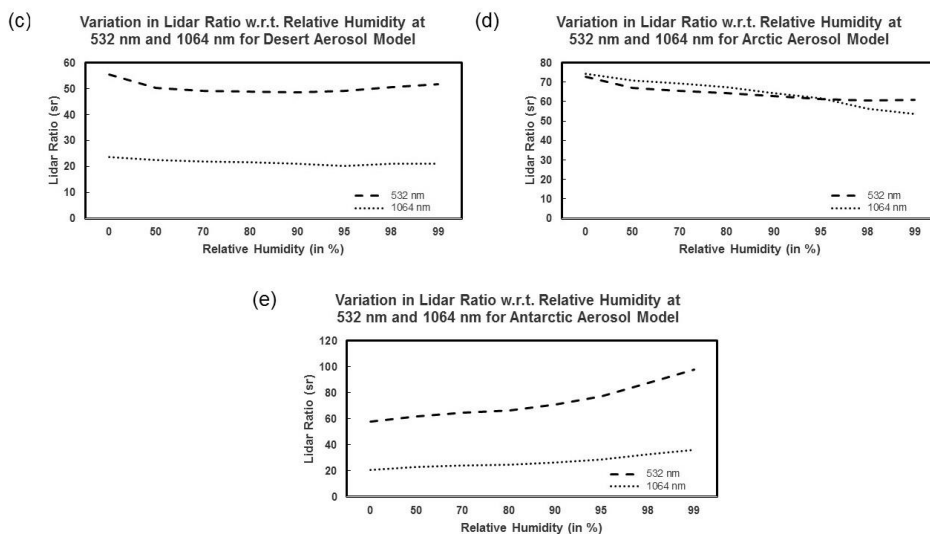

472  
473 **Figure 6: Variation in Lidar Ratio w.r.t. Relative Humidity for (c) Desert Aerosols and (d) Arctic Aerosols and**  
474 **(e) Antarctic Aerosols at 532 nm and 1064 nm.**

475  
476  
477  
478  
479  
480  
481  
482  
483  
484  
485  
486  
487  
488  
489  
490  
491  
492





493

**Table 1:** Physical and Optical Properties of CALIPSO Aerosol Models (Omar et al. 2009)

| Aerosol              | $m_{r,532}$ | $m_{i,532}$ | $m_{r,1064}$ | $m_{i,1064}$ | $\Gamma_{m,fine}$ | $\sigma_{fine}$ | $\Gamma_{m,coarse}$ | $\sigma_{coarse}$ | $\mu_{fine}$ |
|----------------------|-------------|-------------|--------------|--------------|-------------------|-----------------|---------------------|-------------------|--------------|
| Dust                 | 1.414       | 0.0036      | 1.495        | 0.0043       | 0.1165            | 1.4813          | 2.8329              | 1.9078            | 0.223        |
| Smoke                | 1.517       | 0.0234      | 1.541        | 0.0298       | 0.1436            | 1.5624          | 3.7260              | 2.1426            | 0.329        |
| Clean Continental    | 1.380       | 0.0001      | 1.380        | 0.0001       | 0.20556           | 1.6100          | 2.6334              | 1.8987            | 0.050        |
| Polluted Continental | 1.404       | 0.0063      | 1.439        | 0.0073       | 0.1577            | 1.5257          | 3.5470              | 2.0650            | 0.531        |
| Clean Marine         | 1.400       | 0.0050      | 1.400        | 0.0050       | 0.1500            | 1.6000          | 1.2160              | 1.6000            | 0.025        |
| Polluted Dust        | 1.452       | 0.0109      | 1.512        | 0.0137       | 0.1265            | 1.5112          | 3.1617              | 1.9942            | 0.241        |

494

495

496

**Table 2:** Physical and Optical Properties of AERONET Aerosol Models at 673 nm classified using Cluster Analysis (Omar et al. 2005)

| Aerosol    | $m_{r,673}$ | $m_{i,673}$ | $\Gamma_{m,fine}$ | $\sigma_{fine}$ | $\Gamma_{m,coarse}$ | $\sigma_{coarse}$ | $\mu_{fine}$ |
|------------|-------------|-------------|-------------------|-----------------|---------------------|-------------------|--------------|
| Category 1 | 1.4520      | 0.0036      | 0.117             | 1.482           | 2.834               | 1.908             | 0.22         |
| Category 2 | 1.5202      | 0.0245      | 0.144             | 1.562           | 3.733               | 2.144             | 0.33         |
| Category 3 | 1.4494      | 0.0092      | 0.133             | 1.502           | 3.590               | 2.104             | 0.38         |
| Category 4 | 1.4098      | 0.0063      | 0.158             | 1.526           | 3.547               | 2.065             | 0.53         |
| Category 5 | 1.3943      | 0.0044      | 0.165             | 1.611           | 3.268               | 1.995             | 0.26         |
| Category 6 | 1.4104      | 0.0337      | 0.140             | 1.540           | 3.556               | 2.134             | 0.49         |

497

498

499

**Table 3:** Size Distribution of Aerosol Components for Models used in OPAC for Different Relative Humidities (d'Almeida et al. 1991 and Ackermann 1998)

| Component        | $\Gamma_m$ (0%) | $\Gamma_m$ (50%) | $\Gamma_m$ (70%) | $\Gamma_m$ (80%) | $\Gamma_m$ (90%) | $\Gamma_m$ (95%) | $\Gamma_m$ (98%) | $\Gamma_m$ (99%) | $\sigma$ |
|------------------|-----------------|------------------|------------------|------------------|------------------|------------------|------------------|------------------|----------|
| Water Soluble    | 0.0212          | 0.0262           | 0.0285           | 0.0306           | 0.0348           | 0.0399           | 0.0476           | 0.0534           | 2.239    |
| Insoluble        | 0.4710          | 0.4710           | 0.4710           | 0.4710           | 0.4710           | 0.4710           | 0.4710           | 0.4710           | 2.512    |
| Soot             | 0.0118          | 0.0118           | 0.0118           | 0.0118           | 0.0118           | 0.0118           | 0.0118           | 0.0118           | 2.000    |
| Mineral (nuc.)   | 0.0700          | 0.0700           | 0.0700           | 0.0700           | 0.0700           | 0.0700           | 0.0700           | 0.0700           | 1.950    |
| Mineral (acc.)   | 0.3900          | 0.3900           | 0.3900           | 0.3900           | 0.3900           | 0.3900           | 0.3900           | 0.3900           | 2.000    |
| Mineral (coa.)   | 1.9000          | 1.9000           | 1.9000           | 1.9000           | 1.9000           | 1.9000           | 1.9000           | 1.9000           | 2.150    |
| Mineral (trans.) | 0.5000          | 0.5000           | 0.5000           | 0.5000           | 0.5000           | 0.5000           | 0.5000           | 0.5000           | 2.200    |
| Sea Salt (acc.)  | 0.2090          | 0.3360           | 0.3780           | 0.4160           | 0.4970           | 0.6050           | 0.8010           | 0.9950           | 2.030    |
| Sea Salt (coa.)  | 1.7500          | 2.8200           | 3.1700           | 3.4900           | 4.1800           | 5.1100           | 6.8400           | 8.5900           | 2.030    |
| Sulfate          | 0.0695          | 0.0983           | 0.1090           | 0.1180           | 0.1350           | 0.1580           | 0.1950           | 0.2310           | 2.030    |

500

501



502 **Table 4:** Refractive Indices of the Aerosol Components for the OPAC Aerosol Models used in this study  
 503 (d'Almeida et al. 1991 and Ackermann 1998)

| Component     | $m_{r,532}$ | $m_{i,532}$           | $m_{r,1064}$ | $m_{i,1064}$          |
|---------------|-------------|-----------------------|--------------|-----------------------|
| Water Soluble | 1.530       | $5.64 \times 10^{-3}$ | 1.520        | $1.64 \times 10^{-2}$ |
| Insoluble     | 1.530       | $8.0 \times 10^{-3}$  | 1.510        | $8.00 \times 10^{-3}$ |
| Soot          | 1.750       | $4.46 \times 10^{-1}$ | 1.760        | $4.43 \times 10^{-1}$ |
| Mineral       | 1.530       | $6.33 \times 10^{-3}$ | 1.530        | $4.30 \times 10^{-3}$ |
| Sea Salt      | 1.500       | $1.12 \times 10^{-8}$ | 1.470        | $1.95 \times 10^{-4}$ |
| Sulfate       | 1.430       | $1.00 \times 10^{-8}$ | 1.423        | $1.50 \times 10^{-6}$ |
| Water         | 1.333       | $1.61 \times 10^{-9}$ | 1.326        | $1.39 \times 10^{-5}$ |

504

505

**Table 5:** Composition of Aerosol Models used in OPAC (Hess et al. 1998)

| Aerosol Types               | Components       | Number Mixing Ratio $\mu_i$ |
|-----------------------------|------------------|-----------------------------|
| <b>Clean Continental</b>    | Water soluble    | 1.000                       |
|                             | Insoluble        | $0.577 \times 10^{-4}$      |
| <b>Average Continental</b>  | Water Soluble    | 0.458                       |
|                             | Insoluble        | $0.261 \times 10^{-4}$      |
|                             | Soot             | 0.542                       |
| <b>Polluted Continental</b> | Water Soluble    | 0.314                       |
|                             | Insoluble        | $0.120 \times 10^{-4}$      |
|                             | Soot             | 0.686                       |
| <b>Urban</b>                | Water Soluble    | 0.177                       |
|                             | Insoluble        | $0.949 \times 10^{-5}$      |
|                             | Soot             | 0.823                       |
| <b>Clean Maritime</b>       | Water Soluble    | 0.987                       |
|                             | Sea Salt (acc.)  | $0.132 \times 10^{-1}$      |
|                             | Sea Salt (coa.)  | $0.211 \times 10^{-5}$      |
| <b>Tropical Maritime</b>    | Water Soluble    | 0.983                       |
|                             | Sea Salt (acc.)  | $0.167 \times 10^{-1}$      |
|                             | Sea Salt (coa.)  | $0.217 \times 10^{-5}$      |
| <b>Polluted Maritime</b>    | Water Soluble    | 0.422                       |
|                             | Sea Salt (acc.)  | $0.222 \times 10^{-2}$      |
|                             | Sea Salt (coa.)  | $0.356 \times 10^{-6}$      |
|                             | Soot             | 0.576                       |
| <b>Desert</b>               | Water Soluble    | 0.870                       |
|                             | Mineral (nuc.)   | 0.117                       |
|                             | Mineral (acc.)   | $0.133 \times 10^{-1}$      |
|                             | Mineral (coa.)   | $0.617 \times 10^{-4}$      |
| <b>Arctic</b>               | Water Soluble    | 0.197                       |
|                             | Insoluble        | $0.152 \times 10^{-5}$      |
|                             | Sea Salt (acc.)  | $0.288 \times 10^{-3}$      |
|                             | Soot             | 0.803                       |
| <b>Antarctic</b>            | Sulfate          | 0.998                       |
|                             | Sea Salt (acc.)  | $0.109 \times 10^{-2}$      |
|                             | Mineral (trans.) | $0.123 \times 10^{-3}$      |

506

507



508

509 **Table 6:** Lidar Ratio (in sr) estimated using Mie theory for Omar et al. (2005) Aerosol Models

| Aerosol Model | Desert Dust (Category-1) | Biomass Burning (Category -2) | Rural (Background) (Category-3) | Industrial Pollution (Category-4) | Polluted Marine (Category-5) | Dirty Pollution (Category- 6) |
|---------------|--------------------------|-------------------------------|---------------------------------|-----------------------------------|------------------------------|-------------------------------|
| 673 nm        | 28.68                    | 46.92                         | 36.27                           | 44.20                             | 45.18                        | 48.87                         |

510

511 **Table 7:** Lidar Ratio (in sr) Comparison between Theoretical values estimated using Mie Theory and In-situ  
 512 values using Category-1 AERONET Data

| Site/Year          | 2017        | 2018        | 2019        | 2020        | 2021        | Mie Theory Estimate |
|--------------------|-------------|-------------|-------------|-------------|-------------|---------------------|
| <b>Kanpur</b>      | 53.67       | 47.32       | 50.31       | 54.12       | 50.46       | 28.68               |
| <b>Min.</b>        | 36.06       | 21.31       | 30.76       | 32.03       | 29.41       |                     |
| <b>Max.</b>        | 92.52       | 78.92       | 86.23       | 83.53       | 79.75       |                     |
|                    | <b>1998</b> | <b>1999</b> | <b>2004</b> | <b>2005</b> | <b>2006</b> |                     |
| <b>Bahrain</b>     | 47.82       | 37.00       | 40.79       | 37.66       | 34.88       | 28.68               |
| <b>Min.</b>        | 37.40       | 28.32       | 31.43       | 27.78       | 27.68       |                     |
| <b>Max.</b>        | 69.67       | 81.69       | 53.60       | 64.40       | 45.83       |                     |
|                    | <b>2017</b> | <b>2018</b> | <b>2019</b> | <b>2020</b> | <b>2021</b> |                     |
| <b>Banizoumbou</b> | 49.96       | 52.04       | 50.98       | 49.88       | 51.12       | 28.68               |
| <b>Min.</b>        | 27.80       | 29.08       | 37.20       | 32.10       | 41.83       |                     |
| <b>Max.</b>        | 65.81       | 67.73       | 70.83       | 70.75       | 72.14       |                     |

513

514 **Table 8:** Lidar Ratio (in sr) Comparison between Theoretical values estimated using Mie Theory and In-situ  
 515 values using Category-2 AERONET Data

| Site/Year               | 2001          | 2002        | 2003        | 2004        | 2005         | Mie Theory Estimate |
|-------------------------|---------------|-------------|-------------|-------------|--------------|---------------------|
| <b>Abracos Hill</b>     | 52.95         | 53.89       | 51.87       | 50.52       | 55.30        | 46.92               |
| <b>Min.</b>             | 44.99         | 41.63       | 32.30       | 44.24       | 39.87        |                     |
| <b>Max.</b>             | 60.44         | 66.43       | 63.01       | 57.72       | 65.54        |                     |
|                         | <b>2016**</b> | <b>2017</b> | <b>2018</b> | <b>2019</b> | <b>2020*</b> |                     |
| <b>Skukuza</b>          | 38.47         | 49.37       | 43.01       | 44.04       | 63.24        | 46.92               |
| <b>Min.</b>             | 19.14         | 32.50       | 34.98       | 28.56       | 63.24        |                     |
| <b>Max.</b>             | 49.70         | 101.24      | 52.74       | 68.14       | 63.24        |                     |
|                         | <b>2014</b>   | <b>2015</b> | <b>2016</b> | <b>2017</b> | <b>2018</b>  |                     |
| <b>IMS Metu Erdemli</b> | 54.47         | 42.50       | 51.24       | 58.80       | 49.26        | 46.92               |
| <b>Min.</b>             | 22.54         | 27.64       | 31.90       | 35.90       | 27.83        |                     |
| <b>Max.</b>             | 69.72         | 61.70       | 73.60       | 75.06       | 67.43        |                     |

516

\*Only single data value is available

517

\*\*The data has an outlier. Without outlier the value of LR is 43.30 sr.

518

519

520

521



522 **Table 9:** Lidar Ratio (in sr) Comparison between Theoretical values estimated using Mie Theory and In-situ  
 523 values using Category-3 AERONET Data

| Site/Year        | 2002        | 2003        | 2005        | 2006        | 2009*         | Mie Theory Estimate |
|------------------|-------------|-------------|-------------|-------------|---------------|---------------------|
| <b>Konza EDC</b> | 52.25       | 43.95       | 54.47       | 39.38       | 47.83         | 36.27               |
| <b>Min.</b>      | 39.64       | 32.40       | 37.32       | 38.32       | 35.30         |                     |
| <b>Max.</b>      | 64.46       | 73.75       | 85.26       | 40.45       | 58.52         |                     |
|                  |             |             |             |             |               |                     |
|                  | <b>2012</b> | <b>2017</b> | <b>2018</b> | <b>2020</b> | <b>2021**</b> |                     |
| <b>Sevilleta</b> | 44.47       | 48.17       | 42.10       | 58.52       | 53.53         | 36.27               |
| <b>Min.</b>      | 34.65       | 37.09       | 31.75       | 33.45       | 27.39         |                     |
| <b>Max.</b>      | 56.64       | 57.99       | 56.59       | 78.83       | 72.29         |                     |
|                  |             |             |             |             |               |                     |
|                  | <b>2015</b> | <b>2017</b> | <b>2018</b> | <b>2020</b> | <b>2021</b>   |                     |
| <b>Rimrock</b>   | 46.45       | 49.98       | 47.41       | 47.43       | 47.65         | 36.27               |
| <b>Min.</b>      | 37.53       | 35.03       | 29.97       | 39.36       | 33.47         |                     |
| <b>Max.</b>      | 52.55       | 60.36       | 57.35       | 58.93       | 63.86         |                     |

524 \*Only two data values are available  
 525 \*\*The data has an outlier. Without outlier the value of LR is 50.40 sr.

526 **Table 10:** Lidar Ratio (in sr) Comparison between Theoretical values estimated using Mie Theory and In-situ  
 527 values using Category-4 AERONET Data

| Site/Year            | 2009        | 2012        | 2013        | 2014        | 2015        | Mie Theory Estimate |
|----------------------|-------------|-------------|-------------|-------------|-------------|---------------------|
| <b>Mexico City</b>   | 54.44       | 56.86       | 56.99       | 64.40       | 63.40       | 44.20               |
| <b>Min.</b>          | 23.16       | 37.61       | 39.66       | 47.48       | 36.68       |                     |
| <b>Max.</b>          | 87.92       | 77.17       | 91.83       | 81.93       | 99.16       |                     |
|                      |             |             |             |             |             |                     |
|                      | <b>2003</b> | <b>2004</b> | <b>2005</b> | <b>2006</b> | <b>2007</b> |                     |
| <b>Moscow MSU MO</b> | 55.28       | 57.45       | 53.84       | 43.03       | 49.61       | 44.20               |
| <b>Min.</b>          | 46.25       | 43.76       | 37.77       | 30.15       | 33.79       |                     |
| <b>Max.</b>          | 68.83       | 71.03       | 77.44       | 55.44       | 68.28       |                     |
|                      |             |             |             |             |             |                     |
|                      | <b>2015</b> | <b>2016</b> | <b>2017</b> | <b>2018</b> | <b>2019</b> |                     |
| <b>GSFC</b>          | 59.15       | 55.56       | 53.15       | 58.07       | 52.68       | 44.20               |
| <b>Min.</b>          | 39.82       | 47.01       | 50.18       | 40.18       | 40.04       |                     |
| <b>Max.</b>          | 67.93       | 60.78       | 55.15       | 68.84       | 61.79       |                     |

528 **Table 11:** Lidar Ratio (in sr) Comparison between Theoretical values estimated using Mie Theory and In-situ  
 529 values using Category-5 AERONET Data

| Site/Year               | 2002        | 2003        | 2011*       | 2012        | 2013        | Mie Theory Estimate |
|-------------------------|-------------|-------------|-------------|-------------|-------------|---------------------|
| <b>Arica</b>            | 62.45       | 69.22       | 67.68       | 73.63       | 62.94       | 45.18               |
| <b>Min.</b>             | 44.66       | 52.14       | 67.68       | 69.62       | 41.86       |                     |
| <b>Max.</b>             | 90.27       | 86.74       | 67.68       | 76.62       | 77.02       |                     |
|                         |             |             |             |             |             |                     |
|                         | <b>2004</b> | <b>2005</b> | <b>2007</b> | <b>2008</b> | <b>2009</b> |                     |
| <b>La Parguera</b>      | 47.91       | 51.00       | 45.00       | 47.64       | 46.38       | 45.18               |
| <b>Min.</b>             | 45.70       | 48.91       | 37.10       | 45.12       | 39.01       |                     |
| <b>Max.</b>             | 50.72       | 56.92       | 51.73       | 50.99       | 52.49       |                     |
|                         |             |             |             |             |             |                     |
|                         | <b>2013</b> | <b>2014</b> | <b>2015</b> | <b>2016</b> | <b>2017</b> |                     |
| <b>Ascension Island</b> | 54.55       | 55.31       | 59.29       | 52.54       | 70.73       | 45.18               |
| <b>Min.</b>             | 43.57       | 50.08       | 36.15       | 41.35       | 48.15       |                     |
| <b>Max.</b>             | 67.64       | 62.07       | 74.13       | 67.57       | 92.67       |                     |

530 \*Only single data value is available



531 **Table 12:** Lidar Ratio (in sr) Comparison between Theoretical values estimated using Mie Theory and In-situ  
 532 values using Category-6 AERONET Data

| Site/Year               | 2017          | 2018        | 2019        | 2020*       | 2021         | Mie Theory Estimate |
|-------------------------|---------------|-------------|-------------|-------------|--------------|---------------------|
| <b>Dalanzadgad</b>      | 52.80         | 41.68       | 47.58       | 37.85       | 47.43        | 48.87               |
| <b>Min.</b>             | 39.46         | 32.05       | 41.55       | 37.85       | 38.27        |                     |
| <b>Max.</b>             | 66.15         | 51.32       | 50.77       | 37.85       | 56.60        |                     |
|                         |               |             |             |             |              |                     |
|                         | <b>2016**</b> | <b>2017</b> | <b>2018</b> | <b>2019</b> | <b>2020*</b> |                     |
| <b>Skukuza</b>          | 38.47         | 49.37       | 43.01       | 44.04       | 63.24        | 48.87               |
| <b>Min.</b>             | 19.14         | 32.50       | 34.98       | 28.56       | 63.24        |                     |
| <b>Max.</b>             | 49.70         | 101.24      | 52.74       | 68.14       | 63.24        |                     |
|                         |               |             |             |             |              |                     |
|                         | <b>2014</b>   | <b>2015</b> | <b>2016</b> | <b>2017</b> | <b>2018</b>  |                     |
| <b>IMS Metu Erdemli</b> | 54.47         | 42.50       | 51.24       | 58.80       | 49.26        | 48.87               |
| <b>Min.</b>             | 22.54         | 27.64       | 31.90       | 35.90       | 27.83        |                     |
| <b>Max.</b>             | 69.72         | 61.70       | 73.60       | 75.06       | 67.43        |                     |

533 \*Only single data value is available  
 534 \*\*The data has an outlier. Without outlier the value of LR is 43.30 sr.

535  
 536 **Table 13:** Lidar Ratio (in sr) for Aerosol Models in CALIPSO Operational Algorithm

| Wavelength/<br>Aerosol Model                                                           | Dust         | Smoke<br>(Biomass<br>Burning) | Clean<br>Continental | Polluted<br>Continental | Clean<br>Marine | Polluted<br>Dust |
|----------------------------------------------------------------------------------------|--------------|-------------------------------|----------------------|-------------------------|-----------------|------------------|
| <b>Omar et al. (2009) CALIPSO V1 (based on in-situ measurements)</b>                   |              |                               |                      |                         |                 |                  |
| <b>532 nm</b>                                                                          | 40           | 70                            | 35                   | 70                      | 20              | 65               |
| <b>1064 nm</b>                                                                         | 55           | 40                            | 30                   | 40                      | 45              | 30               |
| <b>Lopes et al. (2013) CALIPSO LR Selection Algo. Evaluation (Mean ± S.D.)</b>         |              |                               |                      |                         |                 |                  |
| <b>532 nm</b>                                                                          | 40 ± 20      | 70 ± 28                       | 35 ± 16              | 70 ± 25                 | 20 ± 6          | 55 ± 22          |
| <b>Kim et al. (2018) CALIPSO V3 Operational Algo. (based on in-situ measurements)</b>  |              |                               |                      |                         |                 |                  |
| <b>532 nm</b>                                                                          | 40 ± 20      | 70 ± 25                       | 35 ± 16              | 70 ± 25                 | 20 ± 6          | 55 ± 22          |
| <b>1064 nm</b>                                                                         | 55 ± 17      | 30 ± 14                       | 30 ± 17              | 30 ± 14                 | 45 ± 23         | 48 ± 24          |
| <b>Kim et al. (2018) CALIPSO V4 Operational Algo. (based on in-situ measurements)</b>  |              |                               |                      |                         |                 |                  |
| <b>532 nm</b>                                                                          | 44 ± 9       | 70 ± 25                       | 53 ± 24              | 70 ± 25                 | 23 ± 5          | 55 ± 22          |
| <b>1064 nm</b>                                                                         | 44 ± 13      | 30 ± 14                       | 30 ± 17              | 30 ± 14                 | 23 ± 5          | 48 ± 24          |
| <b>Li et al. (2022) CALIPSO LR Selection Algo. Evaluation using SODA (Mean ± S.D.)</b> |              |                               |                      |                         |                 |                  |
| <b>532 nm (D)</b>                                                                      | 42 ± 19      | 45 ± 17                       | -                    | 45 ± 17                 | 33 ± 15         | 52 ± 19          |
| <b>532 nm (N)</b>                                                                      | 37 ± 13      | 57 ± 18                       | -                    | 57 ± 18                 | 33 ± 16         | 51 ± 18          |
| <b>In-house Derived in this study using Mie Theory</b>                                 |              |                               |                      |                         |                 |                  |
| <b>532 nm</b>                                                                          | <b>38.72</b> | <b>63.37</b>                  | <b>85.98</b>         | <b>64.73</b>            | <b>57.31</b>    | <b>48.22</b>     |
| <b>1064 nm</b>                                                                         | <b>20.11</b> | <b>33.68</b>                  | <b>31.98</b>         | <b>26.44</b>            | <b>71.11</b>    | <b>25.56</b>     |

537  
 538  
 539
